# Supplementary material
Source: PubMed Central journal article supplement (PMC6661230)
Supplement: EMS82878-supplement-Supplementary_Data_1.pdf [file EMS82878-supplement-Supplementary_Data_1.pdf]

| Potential risk factor                                 | Myopia ( $\leq -0.75D$ ) |                                              |         |                                                        |                      |
|-------------------------------------------------------|--------------------------|----------------------------------------------|---------|--------------------------------------------------------|----------------------|
|                                                       | n                        | Unadjusted model<br>OR (95% CI) <sup>1</sup> | p value | Adjusted model<br>OR (95% CI) <sup>2</sup><br>(n=1072) | p value / p<br>trend |
| Age 2 Cognitive ability (g) (standardised scale)      | 1107                     | 0.95 (0.80 – 1.12)                           | 0.525   |                                                        |                      |
| Age 2 Vocabulary total score (scale 0 - 100)          | 1197                     | 1.00 (0.99 – 1.00)                           | 0.172   |                                                        |                      |
| Age 2 Word use total score (scale 0 -5)               | 1184                     | 1.00 (0.87 – 1.14)                           | 0.964   |                                                        |                      |
| Age 2 Sentence complexity score (scale 0 -13)         | 1184                     | 1.00 (0.94 – 1.05)                           | 0.940   |                                                        |                      |
| Age 2 Anxiety (scale 0 -12)                           | 1192                     | 0.94 (0.87 – 1.01)                           | 0.085†  |                                                        |                      |
| Age 2 Hyperactivity problems (scale 0 -54)            | 1191                     | 0.96 (0.89 – 1.04)                           | 0.327   |                                                        |                      |
| Age 2 Restless (no / sometimes / certainly)           | 1190                     | 0.84 (0.68 – 1.04)                           | 0.105   |                                                        |                      |
| Age 2 Poor concentration (no / sometimes / certainly) | 1185                     | 0.90 (0.72 – 1.11)                           | 0.312   |                                                        |                      |
| Age 2 Inattentive (no / sometimes / certainly)        | 1148                     | 1.07 (0.81 – 1.40)                           | 0.645   |                                                        |                      |
| Age 3 Cognitive ability (g) (standardised scale)      | 1147                     | 0.98 (0.83 – 1.15)                           | 0.803   |                                                        |                      |
| Age 3 Number of children's books                      | 1328                     | 0.99 (0.85 – 1.15)                           | 0.877   |                                                        |                      |
| Age 3 Use of outdoor toys (always / usually / no)     | 1340                     | 0.98 (0.74 – 1.30)                           | 0.903   |                                                        |                      |
| Age 3 Problems with eyesight                          |                          |                                              |         |                                                        |                      |
| - No                                                  | 1261                     | 1.00                                         |         | 1.00                                                   |                      |
| - Yes                                                 | 56                       | 0.25 (0.10 – 0.65)                           | 0.004*  | 0.23 (0.09 - 0.60)                                     | 0.002*               |
| Age 3 Vocabulary total score (scale 0 - 100)          | 1235                     | 0.99 (0.99 -1.00)                            | 0.071†  |                                                        |                      |
| Age 3 Word use total score (scale 0 - 12)             | 1229                     | 0.97 (0.92 – 1.03)                           | 0.352   |                                                        |                      |
| Age 3 Sentence complexity score (scale 0 - 12)        | 1228                     | 0.99 (0.95 – 1.03)                           | 0.583   |                                                        |                      |
| Age 3 Verbal cognition (standardised scale)           | 1225                     | 0.95 (0.82 – 1.11)                           | 0.543   |                                                        |                      |
| Age 3 Non-verbal cognition (standardised scale)       | 1300                     | 1.08 (0.93 – 1.26)                           | 0.310   |                                                        |                      |
| Age 3 Anxiety (scale 0 - 12)                          | 1330                     | 0.95 (0.90 – 1.02)                           | 0.150   |                                                        |                      |
| Age 3 Hyperactivity (scale 0 - 8)                     | 1331                     | 1.03 (0.96 – 1.10)                           | 0.463   |                                                        |                      |
| Age 3 Restless (no / sometimes / certainly)           | 1327                     | 1.10 (0.91 – 1.33)                           | 0.321   |                                                        |                      |
| Age 3 Poor concentration (no / sometimes / certainly) | 1329                     | 1.04 (0.85 – 1.28)                           | 0.696   |                                                        |                      |
| Age 3 Inattentive (no / sometimes / certainly)        | 1316                     | 1.01 (0.80 – 1.28)                           | 0.910   |                                                        |                      |
| Age 3 Height (centimetres)                            | 1144                     | 1.67 (0.10 - 28.34)                          | 0.722   |                                                        |                      |
| Age 3 Weight (kilograms)                              | 1169                     | 0.94 (0.88 - 1.01)                           | 0.104   |                                                        |                      |
| Age 4 Cognitive ability (g) (standardised scale)      | 1595                     | 1.01 (0.87 -1.17)                            | 0.869   |                                                        |                      |
| Age 4 Verbal cognition (standardised scale)           | 1678                     | 1.00 (0.86 – 1.15)                           | 0.997   |                                                        |                      |
| Age 4 Non-verbal cognition (standardised scale)       | 1700                     | 1.07 (0.93 – 1.22)                           | 0.329   |                                                        |                      |

|                                                                   |      |                     |        |
|-------------------------------------------------------------------|------|---------------------|--------|
| Age 4 Problems with eyesight (y/n)                                | 1743 | 0.68 (0.41 - 1.12)  | 0.130  |
| Age 4 Number of children's books                                  | 1725 | 0.96 (0.84 - 1.11)  | 0.589  |
| Age 4 Physical games (standardised scale)                         | 1722 | 0.98 (0.87 - 1.10)  | 0.740  |
| Age 4 Use of outdoor toys (always / usually / no)                 | 1729 | 1.25 (0.98 - 1.62)  | 0.070† |
| Age 4 Likes being read to (y/n)                                   | 1710 | 1.95 (0.25 - 15.40) | 0.527  |
| Age 4 Ability to sound out letters (no / yes all / yes some)      | 1686 | 0.96 (0.82 - 1.11)  | 0.565  |
| Age 4 Ability to sound out words (no / yes all / yes some)        | 1689 | 1.00 (0.75 - 1.33)  | 0.988  |
| Age 4 Ability to tell what a word means (no / yes all / yes some) | 1692 | 1.31 (0.91 - 1.88)  | 0.149  |
| Age 4 Restless (no / sometimes / certainly)                       | 1712 | 1.00 (0.85 - 1.17)  | 0.954  |
| Age 4 Easily distracted (no / sometimes / certainly)              | 1708 | 0.99 (0.83 - 1.18)  | 0.925  |
| Age 4 Sees task through (no / sometimes / certainly)              | 1708 | 0.94 (0.79 - 1.12)  | 0.477  |
| Age 4 Inattentive (no / sometimes / certainly)                    | 1689 | 1.06 (0.85 - 1.32)  | 0.599  |
| Age 4 Picture vocabulary total score (scale 0 - 8)                | 1708 | 0.99 (0.90 - 1.09)  | 0.852  |
| Age 4 Vocabulary total score (scale 0 - 48)                       | 1719 | 1.00 (0.98 - 1.02)  | 0.784  |
| Age 4 Anxiety (scale 0 - 10)                                      | 1710 | 0.99 (0.92 - 1.06)  | 0.744  |
| Age 4 Hyperactivity (scale 0 - 8)                                 | 1713 | 1.02 (0.96 - 1.09)  | 0.514  |
| Age 4 Height (centimetres)                                        | 1451 | 0.28 (0.02 - 3.27)  | 0.312  |
| Age 4 Weight (kilograms)                                          | 1481 | 0.97 (0.92 - 1.02)  | 0.242  |

### Preschool factors

<sup>1</sup> Adjusted for family relatedness <sup>2</sup> Adjusted for age at refraction, sex, family relatedness, significant factors in univariable analyses & factors significant in adjusted analyses at any earlier life stages. Significance thresholds: \* = p-value <0.05, † = p-value <0.10. Abbreviations: OR = odds ratio, CI = confidence interval, g = composite score of cognitive ability.
