# Supplementary material
Source: PubMed Central journal article supplement (PMC6661230)
Supplement: EMS82878-supplement-Supplementary_Data_2.pdf [file EMS82878-supplement-Supplementary_Data_2.pdf]

| Potential risk factor                                    | Myopia ( $\leq -0.75D$ ) |                                              |         |                                                       |                      |
|----------------------------------------------------------|--------------------------|----------------------------------------------|---------|-------------------------------------------------------|----------------------|
|                                                          | n                        | Unadjusted model<br>OR (95% CI) <sup>1</sup> | p value | Adjusted model<br>OR (95% CI) <sup>2</sup><br>(n=881) | p value / p<br>trend |
| Age 7 Mother highest qualification level (scale 1 - 8)   | 1707                     | 1.10 (1.02 - 1.17)                           | 0.009*  | 0.91 (0.76 - 1.08)                                    | 0.259                |
| Age 7 Father highest qualification level (scale 1 - 8)   | 1511                     | 1.06 (0.99 - 1.14)                           | 0.079†  |                                                       |                      |
| Age 7 Working mother                                     | 1788                     |                                              |         |                                                       |                      |
| - Working                                                | 1278                     | 1.00                                         |         |                                                       |                      |
| - Full time parent                                       | 434                      | 0.71 (0.53 - 0.97)                           |         |                                                       |                      |
| - Not working                                            | 76                       | 1.04 (0.58 - 1.88)                           | 0.099†  |                                                       |                      |
| Age 7 Working father                                     | 1659                     |                                              |         |                                                       |                      |
| - Working                                                | 1555                     | 1.00                                         |         | 1.00                                                  |                      |
| - Full time parent                                       | 83                       | 2.01 (1.15 - 3.51)                           |         | 1.39 (0.69 - 2.79)                                    |                      |
| - Not working                                            | 21                       | 1.97 (0.62 - 3.51)                           | 0.002*  | 1.31 (0.27 - 6.34)                                    | 0.337                |
| Age 7 Cognitive ability (g) (standardized scale)         | 1371                     | 1.13 (0.97 - 1.30)                           | 0.108   |                                                       |                      |
| Age 7 Verbal cognitive ability (standardized scale)      | 1372                     | 1.12 (0.97 - 1.29)                           | 0.113   |                                                       |                      |
| Age 7 Non-verbal cognitive ability (standardized scale)  | 1382                     | 1.09 (0.94 - 1.26)                           | 0.250   |                                                       |                      |
| Age 7 Easily distracted (no / somewhat / certainly)      | 1794                     | 0.99 (0.85 - 1.16)                           | 0.928   |                                                       |                      |
| Age 7 Easily distracted (no / somewhat / certainly)      | 1593                     | 1.00 (0.83 - 1.19)                           | 0.961   |                                                       |                      |
| Age 7 Restless & overactive(no / somewhat / certainly )  | 1593                     | 1.08 (0.88 - 1.33)                           | 0.464   |                                                       |                      |
| Age 8 Connors inattention scale (scale 0 -27)            | 1744                     | 1.01 (0.99 - 1.04)                           | 0.264   |                                                       |                      |
| Age 10 Cognitive ability (g) (standardized scale)        | 1079                     | 1.22 (1.01 - 1.47)                           | 0.038*  | collinearity                                          |                      |
| Age 10 Verbal cognitive ability (standardized scale)     | 1079                     | 1.29 (1.08 - 1.55)                           | 0.005*  | 1.23 (0.97 - 1.56)                                    | 0.081†               |
| Age 10 Non-verbal cognitive ability (standardized scale) | 1080                     | 1.09 (0.91 - 1.31)                           | 0.366   |                                                       |                      |

### Childhood factors

<sup>1</sup> Adjusted for family relatedness <sup>2</sup> Adjusted for age at refraction, sex, family relatedness, significant factors in univariable analyses & factors significant in adjusted analyses at any earlier life stages. Significance thresholds: \* = p-value <0.05, † = p-value <0.10. Abbreviations: OR = odds ratio, CI = confidence interval, g = composite score of cognitive ability
